# Supplementary material for: An optogenetic toolbox for unbiased discovery of functionally connected cells in neural circuits
Source: Springer Nature journal article supplement (doi:10.1038/s41467-017-00160-z), 2017-07-17
Supplement: MOESM1 [file 41467_2017_160_MOESM1_ESM.pdf]

File Name: Supplementary Information

Descriptions: Supplementary Figures and Supplementary References

File Name: Peer Review File

Descriptions:

File Name: Supplementary Movie 1

Descriptions: Stimulation of ChrimsonR-expressing cells evokes behavior in zebrafish. A 5 dpf larva expressing ChrimsonR-tagRFP in nMLF cells is head-embedded in agarose, with its tail free to move. A 50  $\mu\text{m}$  optic fiber targets 638 nm light (0.1 mW) to the region of the nMLF and is moved in a vertical direction. Light exposure starts at 2.6 s and evokes a tail steering response. See Supplementary Figure 2 for details.

File Name: Supplementary Movie 2

Descriptions: 3D reconstruction of Optobow-n expression in tectal cells. Filament tracings show a descending axon of the ChrimsonR-expressing cell (magenta), a bistratified morphology of the first connected cell (yellow), and a contralaterally projecting axon of the second connected cell (orange). Anterior is left, lateral is up. See Figure 2 for details.

File Name: Supplementary Movie 3

Descriptions: 3D reconstruction of a reference brain including functionally connected cell pairs from seven individual fish. Volume rendering of the reference brain shows DAPI staining (blue), and orthogonal slicer shows DAPI (blue) and HuC (red) staining. See Figure 8 for details.

# Supplementary Figure 1

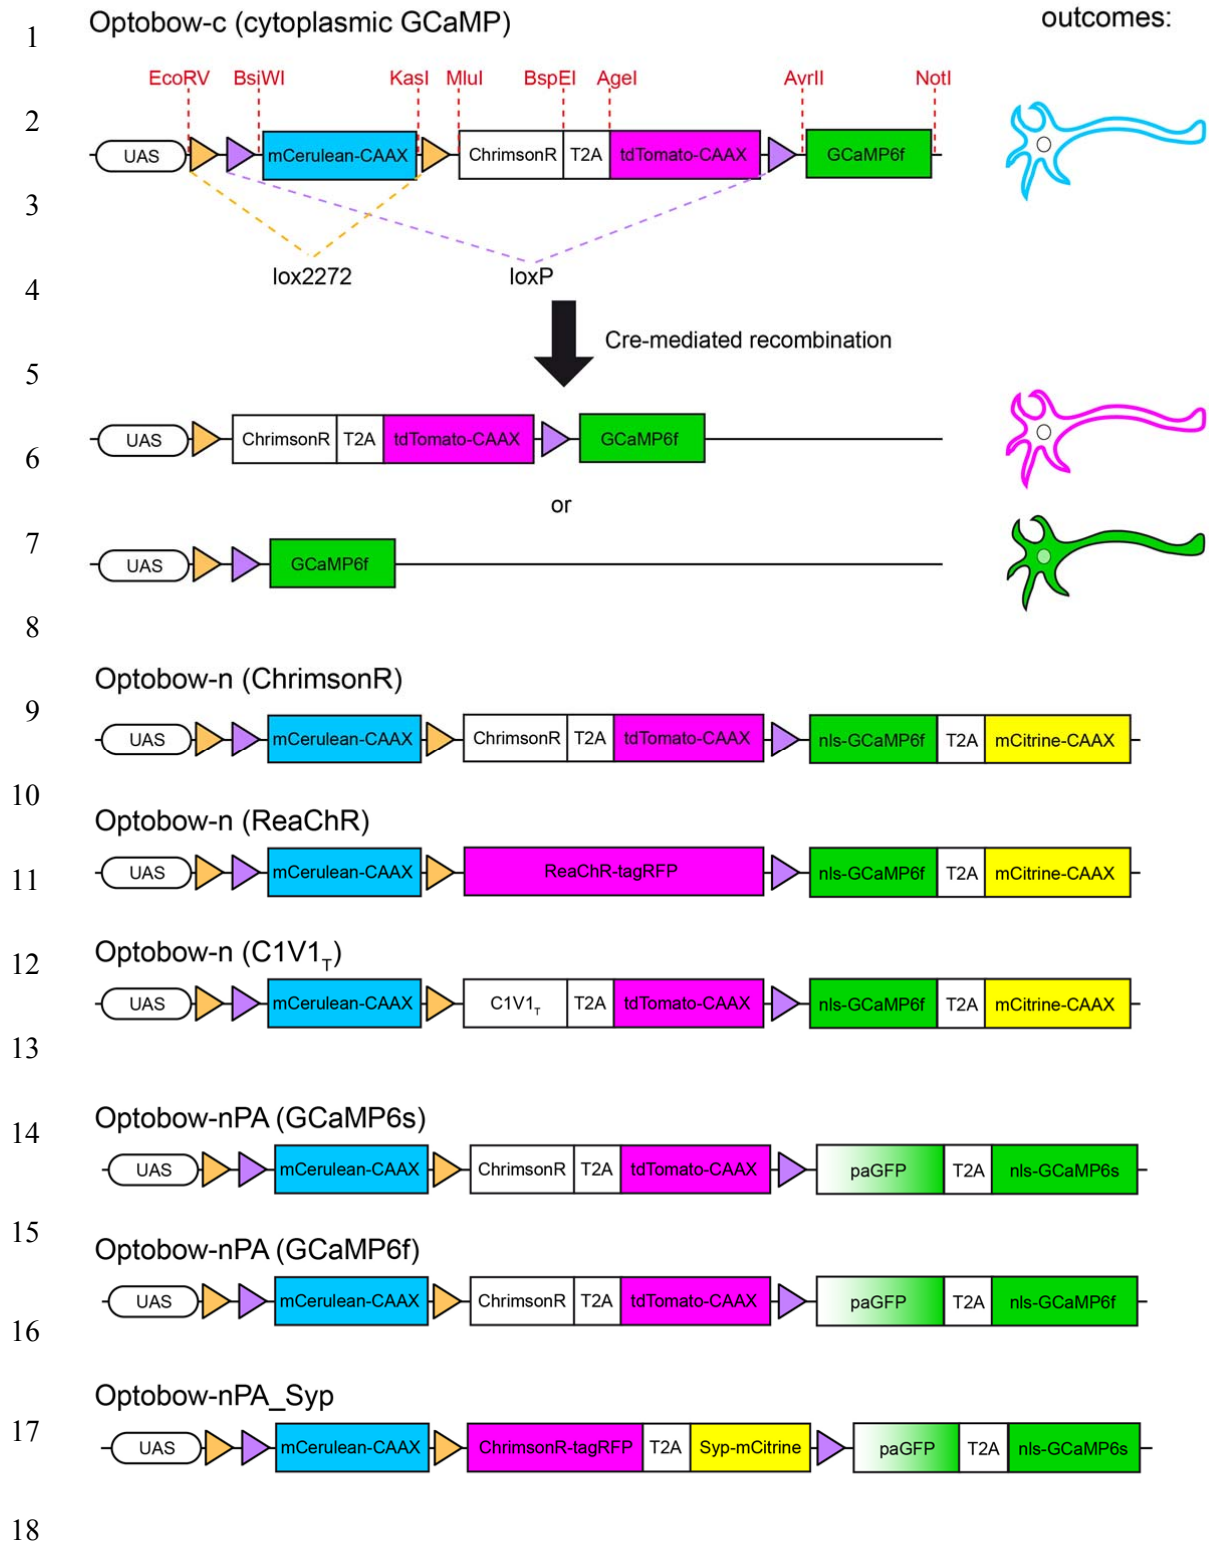

19 **Supplementary Figure 1. Optobow enables stochastic and mutually exclusive expression**  
 20 **of optogenetic actuator and indicator.** Schematic of available Optobow constructs.  
 21 Expression is dependent on the Gal4-UAS system. The open reading frames for mCerulean,

22 ChrimsonR-T2A-tdTomato and GCaMP6f are separated by loxP or lox2272 sites and are each  
23 followed by polyadenylation signals. mCerulean and tdTomato are both membrane-targeted  
24 (CAAX motif). Sketches for the different expression outcomes are depicted on the right.  
25 Unique restriction sites for easy replacement of open reading frames are shown in red. The  
26 Optobow-n constructs featuring the optogenetic actuators C1V1<sub>T</sub> or ReaChR (although not  
27 described in the text) have been tested successfully for functional connectivity mapping.

28

29

30

31

32

33

34

35

36

37

38

39

40

41

42

43

## Supplementary Figure 2

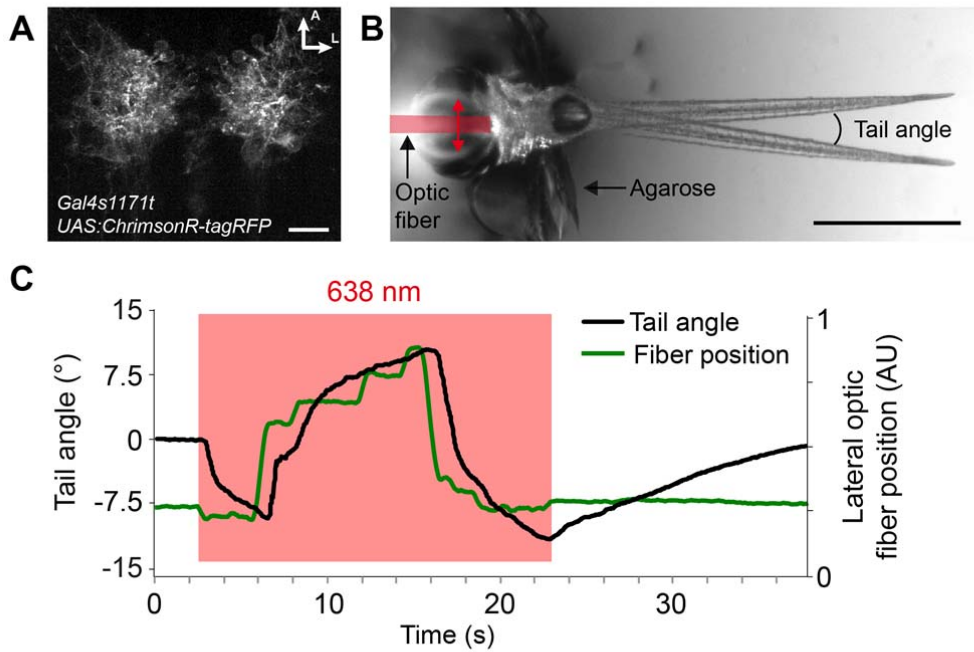

44

45 **Supplementary Figure 2. Stimulation of ChrimsonR-expressing cells elicits behavior in**

46 **larval zebrafish. (A)** Transgenic ChrimsonR-tagRFP expression in the nucleus of the medial

47 longitudinal fasciculus (nMLF) of a 5 dpf zebrafish larva. Scale bar, 20  $\mu$ m. **(B)** Optogenetic

48 setup as published previously<sup>1</sup>. The head of the same fish from (A) is embedded in agarose

49 with its tail freed. A 50  $\mu$ m optic fiber targets 638 nm light (0.1 mW) onto the region of the

50 nMLF and is moved in a vertical direction. A projection of the initial and maximum left-

51 deflected tail positions is shown. Scale bar, 1 mm. **(C)** Measurement of the tail angle and the

52 fiber position over time of the fish shown in (B). The red rectangle depicts the epoch of 638

53 nm light stimulation.

54

55

56

57

## Supplementary Figure 3

| Construct                | Fish line                        | Expression (w/o Cre)                                                                 | Variation |
|--------------------------|----------------------------------|--------------------------------------------------------------------------------------|-----------|
| Optobow-c                | <i>Tg(UAS:Optobow-c)mpn135</i>   | 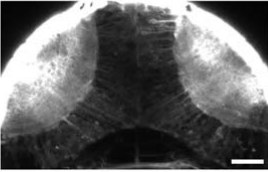   | weak      |
| Optobow-c                | <i>Tg(UAS:Optobow-c)mpn136</i>   |    | medium    |
| Optobow-n                | <i>Tg(UAS:Optobow-n)mpn137</i>   |    | medium    |
| Optobow-n                | <i>Tg(UAS:Optobow-n)mpn138</i>   |   | weak      |
| Optobow-nPA<br>(nls-G6s) | <i>Tg(UAS:Optobow-nPA)mpn141</i> |  | medium    |
| Optobow-nPA<br>(nls-G6s) | <i>Tg(UAS:Optobow-nPA)mpn139</i> |  | strong    |
| Optobow-nPA<br>(nls-G6f) | <i>Tg(UAS:Optobow-nPA)mpn140</i> |  | medium    |

59

60 **Supplementary Figure 3. List of available Optobow zebrafish lines.** Variiegation of the  
61 different UAS-transgenic lines was scored based on expression of mCerulean-CAAX from  
62 the pan-neuronal driver *Gal4s1101t*. Scale bar: 40  $\mu$ m.

## Supplementary Figure 4

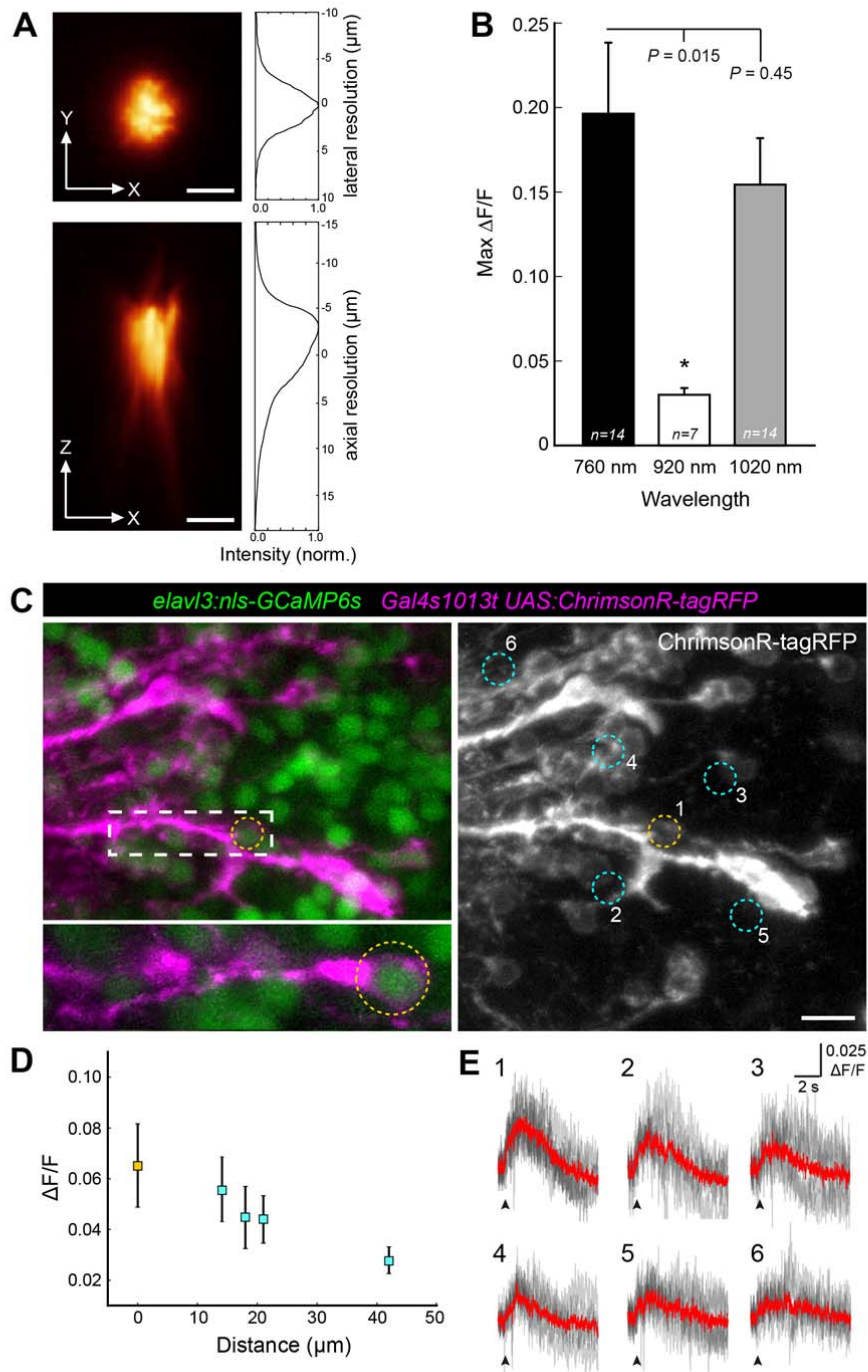

63

64 **Supplementary Figure 4: Characterization of 2P holography photostimulation.** (A) Axial  
 65 (top) and lateral (bottom) extension of a circular illumination pattern with a diameter of 6  $\mu\text{m}$ .  
 66 960 nm light was used to excite a thin layer of Fluorescein solution ( $0.2 \text{ mW } \mu\text{m}^{-2}$ ). Axial and

67 lateral intensity profiles are shown on the right. Scale bar, 5  $\mu\text{m}$ . **(B)** Maximum calcium  
68 responses obtained upon photostimulation of ChrimsonR-expressing cells using different  
69 wavelengths. Excitation of Chrimson at 760 nm resulted in relatively large responses, likely  
70 driven by a single photon absorption mechanism. Data obtained from Optobow-nPA  
71 experiments in tectal cells. Error bars indicate SEM. **(C-E)** Characterization of ChrimsonR  
72 photostimulation selectivity *in vivo*. **(C)** Maximum projection of a confocal stack showing  
73 tectal cells in a 6 dpf zebrafish larva with a dense expression of ChrimsonR-tagRFP (left:  
74 magenta, right: white) and pan-neuronal nls-GCaMP6s (green). A close-up single confocal  
75 slice of the targeted cell is shown below the projection. A 6  $\mu\text{m}$ -diameter excitation spot was  
76 used for on-target (orange circle, #1) or off-target (cyan circles, #2-6) photostimulations at  
77 1020 nm (200 ms), while calcium responses of cell#1 were recorded simultaneously. Scale  
78 bar, 10  $\mu\text{m}$ . **(D)** Averaged maximum  $\Delta F/F$  calcium responses obtained from on-target and off-  
79 target stimulations as a function of distance between the recorded cell (#1) and the excitation  
80 spot. Error bars are SEM. **(E)** Raw (gray) and averaged (red)  $\Delta F/F$  profiles of six excitation  
81 trials for the different spot positions indicated in (C). Stimulation time points are indicated by  
82 arrowheads.

83

84

85

86

87

88

89

90

91

## Supplementary Figure 5

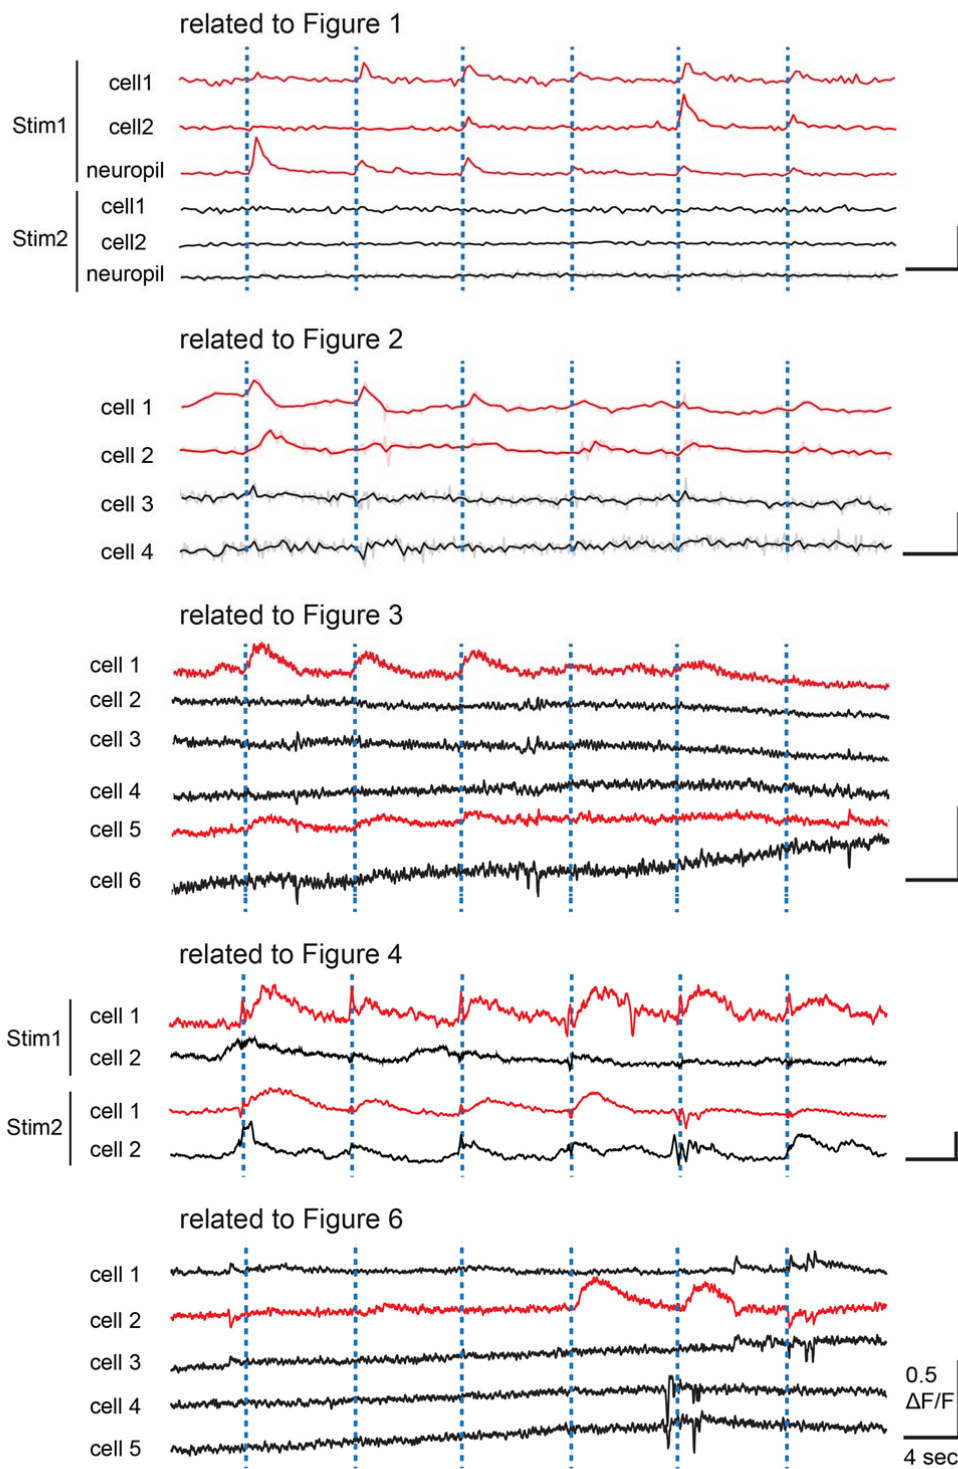

92 **Supplementary Figure 5. Calcium measurements displayed as  $\Delta F/F$  profiles.**

93 Photostimulation events are indicated by dashed blue lines. Raw, as well as averaged (dark  
94 colours) transients are shown. In Figure 3, stimulation events no. 1, 2, and 3, and in Figure 6,  
95 stimulation events no. 3, 4, and 5 are shown.



## Supplementary Figure 6

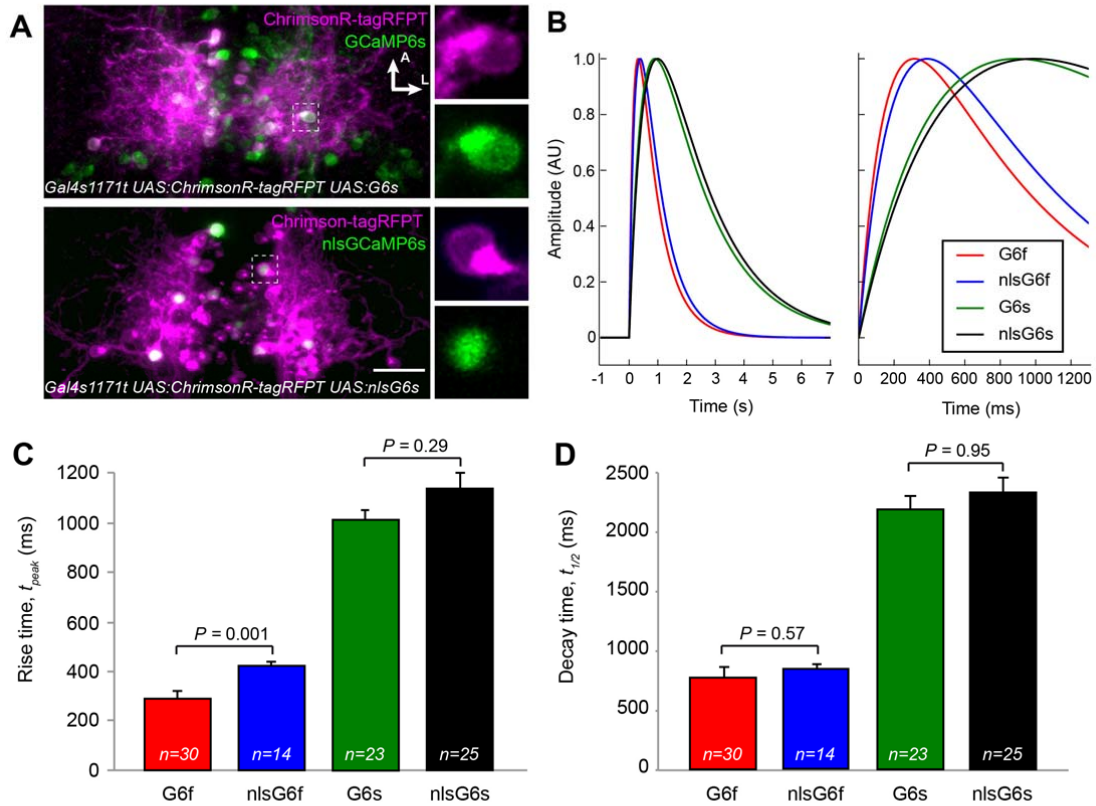

96

97 **Supplementary Figure 6. Comparison of cytoplasmic and nuclear GCaMP6 variants.**

98 **(A)** GCaMP6 dynamics were measured in nMLF cells (*Gal4s1171t*) transiently expressing  
 99 ChromsonR-tagRFP and either of the GCaMP6 variants. Single cells were photostimulated  
 100 with 200 ms of 760 nm light and the GCaMP transients were measured by  $\sim$ 300 Hz line scans  
 101 across the soma of the stimulated cell. Single-channel closeups shown on the right of the  
 102 regions indicated by dashed boxes, show membrane, cytoplasmic, or nuclear localization of  
 103 ChromsonR-tagRFP, GCaMP6s or nls-GCaMP6s, respectively. G6s, GCaMP6s; G6f,  
 104 GCaMP6f. Scale bar, 30  $\mu$ m. **(B)** Normalized mathematical fit for the fluorescence responses  
 105 of all measured GCaMP6 versions. Number of trials ( $n$ ) is indicated in (C) and (D). **(C)**  
 106 Comparison of fluorescence rise times to peak intensity. **(D)** Comparison of half decay times.  
 107 Error bars indicate SEM.

## Supplementary Figure 7

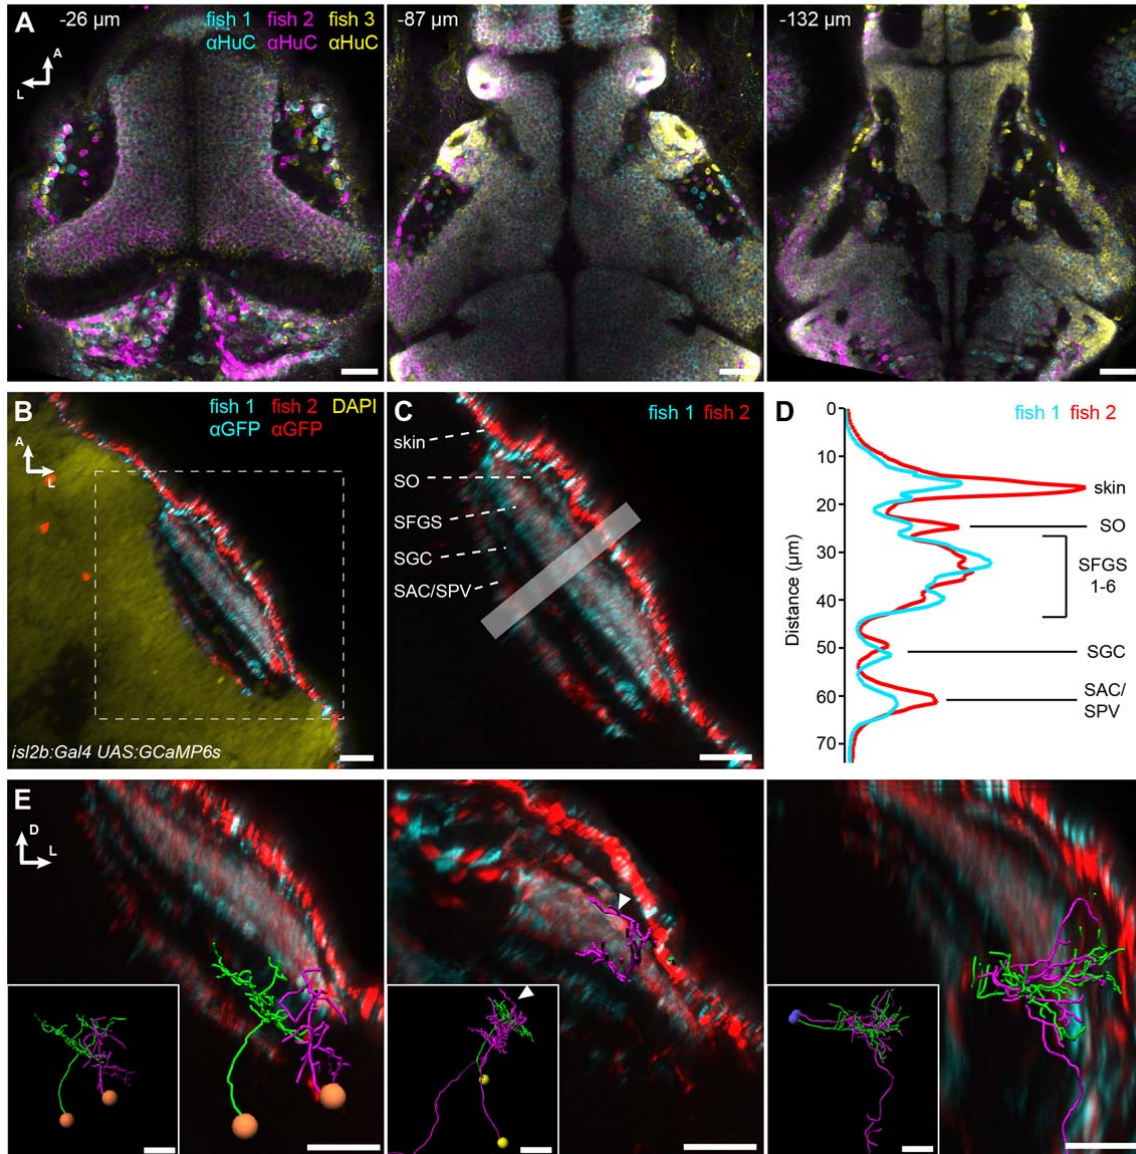

108 **Supplementary Figure 7. Accuracy of registration and addition of anatomical reference**  
 109 **patterns.** (A) Three 5 dpf Optobow-nPA-expressing larvae stained for HuC have been  
 110 registered into one reference brain. Note the accuracy of registration at different z levels  
 111 (labeled as distance from dorsal skin in  $\mu\text{m}$ ). Scale bar, 30  $\mu\text{m}$ . (B) Two 5 dpf larvae  
 112 expressing GCaMP6s under control of *isl2b:Gal4* (stained for GFP) were co-registered into  
 113 the reference brain. Scale bar, 20  $\mu\text{m}$ . (C) A closeup of the tectal neuropil shows the different  
 114 innervation strata of RGC axons. SO, stratum opticum; SFGS, stratum fibrosum et griseum  
 115 superficiale; SGC, stratum griseum centrale; SAC/SPV, stratum album centrale/stratum

116 periventriculare. Scale bar, 20  $\mu\text{m}$ . **(D)** Intensity profiles through the boxed region in (C)  
117 show the alignment accuracy of RGC innervation strata. **(E)** Examples of three co-registered  
118 cell pairs and their dendritic and axonal arborizations in specific tectal layers. Insets taken  
119 from Figure 8. Scale bar, 20  $\mu\text{m}$ .

120

## 121 **Supplementary References**

122 1. Thiele, T. R., Donovan, J. C. & Baier, H. Descending control of swim posture by a  
123 midbrain nucleus in zebrafish. *Neuron* **83**, 679–691 (2014).
